# Supplementary material for: Association between use of macrolides in pregnancy and risk of major birth defects: nationwide, register based cohort study
Source: PubMed Central journal article supplement — BMJ. 2021 Feb 10;372:n107. doi: 10.1136/bmj.n107 (PMC7873722; doi:10.1136/bmj.n107), 2021-02-10
Supplement: andn061108.ww.pdf [file andn061108.ww.pdf]

## Supplementary Material

For “Association between use of macrolides use in pregnancy and risk of major birth defects”  
Andersson et al.

### Definition of major birth defects.

**Supplementary Table A.** Definition of covariates included in propensity score with definitions and data sources.

**Supplementary Table B.** Number of missing values and percentages (%) for the unmatched study cohorts.

**Supplementary Table C.** Baseline characteristics of unmatched cohorts. Values are numbers (percentages) unless otherwise stated.

**Supplementary Table D.** Number of tablets redeemed and days of coverage.

**Supplementary Table E.** Additional pregnancy outcomes for the matched main comparison between macrolide-exposed and penicillin-exposed pregnancies.

**Supplementary Table F.** Standardized differences before and after propensity score matching.

**Supplementary Figure (A-C).** Distribution of propensity scores before and after matching.

**Supplementary Table G.** Cases of major birth defects and absolute risk differences per 1000 pregnancies among macrolide-exposed compared with penicillin-exposed pregnancies.

**Supplementary Table H.** Cases of major birth defects and absolute risk differences per 1000 pregnancies among macrolide-exposed compared with unexposed pregnancies with recent use.

**Supplementary Table I.** Cases of major birth defects and absolute risk differences per 1000 pregnancies among macrolide-exposed compared with unexposed pregnancies.

**Supplementary Table J.** Cases of major birth defects and absolute risk differences per 1000 pregnancies among azithromycin-exposed compared with penicillin-exposed pregnancies.

**Supplementary Table K.** Cases of major birth defects and absolute risk differences per 1000 pregnancies among erythromycin-exposed compared with penicillin-exposed pregnancies.

**Supplementary Table L.** Cases of major birth defects and absolute risk differences per 1000 pregnancies among roxithromycin-exposed compared with penicillin-exposed pregnancies.

**Supplementary Table M.** Sensitivity analyses for the association between macrolide exposure in pregnancies and risk of any major birth defects compared with penicillin exposure in the first trimester of pregnancy.

**Supplementary Table N.** Post-hoc analysis for the association between macrolide exposure in any trimester or in 2<sup>nd</sup> and 3<sup>rd</sup> trimester only and risk of any major birth defects and defects of external genital organs.

## References

## **Definition of major birth defects.**

Through the National Patient Registry, we identified outcome cases of major birth defects diagnosed within the first year of life.[1] Major malformations were defined according to the European Surveillance of Congenital Anomalies (EUROCAT) classification system of subgroups of major congenital anomalies, while excluding minor defects according EUROCAT exclusion list.[2] Major birth defects of known causes were excluded, including: genetic syndromes (ICD-10: Q447B, Q619A, Q751, Q754, Q771, Q772, Q780, Q796, Q85, Q87), malformation syndromes with known causes (ICD-10: Q86), and malformations due to chromosomal aberrations (ICD-10: Q90-99).

**Supplementary Table A. Definition of covariates included in propensity score with definitions and data sources.**

| <b>Variable</b>                             | <b>Categories</b>                                                                                                               | <b>Data source</b>                       |
|---------------------------------------------|---------------------------------------------------------------------------------------------------------------------------------|------------------------------------------|
| Age at pregnancy onset                      | ≤19, 20-24, 25-29, 30-34, ≥35                                                                                                   | Central Person Registry                  |
| Married or living with partner              | Yes/no                                                                                                                          | Central Person Registry                  |
| Place of birth                              | Denmark, Europe, Outside Europe                                                                                                 | Central Person Registry                  |
| Region of residence                         | The Capital Region of Denmark, Region Zealand, The Region of Southern Denmark, Central Denmark Region, The North Denmark Region | Central Person Registry                  |
| Gross household income                      | Quartiles                                                                                                                       | Statistic Denmark                        |
| Education level, years                      | ≤11, 12-13, 14-15, ≥16                                                                                                          | Statistic Denmark                        |
| Year of pregnancy onset                     | 1997-2000, 2001-2004, 2005-2008, 2009-2012, 2013-2016                                                                           | Medical Birth Registry                   |
| Parity                                      | 1,2, ≥3                                                                                                                         | Medical Birth Registry                   |
| Multiple birth pregnancy                    | Yes/no                                                                                                                          | Medical Birth Registry                   |
| Smoking during pregnancy                    | Yes/no                                                                                                                          | Medical Birth Registry                   |
| Previous pregnancy with major birth defect  | Yes/no                                                                                                                          | National Patient Registry                |
| Antidiabetic drug use in past year          | ATC: A10A, A10B                                                                                                                 | Registry of Medicinal Product Statistics |
| Drugs used for IVF in past 3 months         | ATC: G03G, G03DA04, H01CC, L02AE01                                                                                              | Registry of Medicinal Product Statistics |
| No. of drugs used in past year              | 0, 1-2, 3-4, ≥5                                                                                                                 | Registry of Medicinal Product Statistics |
| No. of days of hospitalization in past year | 0, 1-2, ≥3                                                                                                                      | National Patient Registry                |
| No. of outpatient contacts in past year     | 0, 1-2, ≥3                                                                                                                      | National Patient Registry                |

ATC: anatomic therapeutic chemical; IVF: in vitro fertilization.

**Supplementary Table B. Number of missing values (percentages) for the unmatched study cohorts.**

| <b>Variable</b>                                        | <b>Macrolide vs penicillin (n=64,534)</b> | <b>Macrolide vs recent use (n=53,364)</b> | <b>Macrolide vs unexposed (n=1,008,692)</b> |
|--------------------------------------------------------|-------------------------------------------|-------------------------------------------|---------------------------------------------|
| Age at pregnancy onset                                 | 0                                         | 0                                         | 0                                           |
| Married or living with partner                         | 164 (0.3)                                 | 135 (0.3)                                 | 13624 (1.4)                                 |
| Place of birth                                         | 2 (0.0)                                   | 3 (0.0)                                   | 311 (0.0)                                   |
| Region of residence                                    | 0                                         | 0                                         | 0                                           |
| Gross household income                                 | 2 (0.0)                                   | 3 (0.0)                                   | 666 (0.1)                                   |
| Education level, years                                 | 1643 (2.5)                                | 1141 (2.1)                                | 40525 (4.0)                                 |
| Year of pregnancy onset                                | 0                                         | 0                                         | 0                                           |
| Parity                                                 | 294 (0.5)                                 | 317 (0.6)                                 | 5420 (0.5)                                  |
| Multiple birth pregnancy                               | 0                                         | 0                                         | 0                                           |
| Smoking during pregnancy                               | 1668 (2.6)                                | 1430 (2.7)                                | 23550 (2.3)                                 |
| Previous pregnancy with the same adverse fetal outcome | 0                                         | 0                                         | 0                                           |
| Antidiabetic drug use in past year                     | 0                                         | 0                                         | 0                                           |
| Drugs used for IVF in past 3 months                    | 0                                         | 0                                         | 0                                           |
| No. of drugs used in past year                         | 0                                         | 0                                         | 0                                           |
| Hospital care utilization in past year                 | 0                                         | 0                                         | 0                                           |

**Supplementary Table C. Baseline characteristics of unmatched cohorts.<sup>a</sup>**

| Characteristics                               | Unmatched pregnancy cohorts for analysis of major birth defects |                              |                                     |                      |
|-----------------------------------------------|-----------------------------------------------------------------|------------------------------|-------------------------------------|----------------------|
|                                               | Macrolide-exposed (n=13019)                                     | Penicillin-exposed (n=51515) | Unexposed with recent use (n=40345) | Unexposed (n=995673) |
| GA at drug use initiation, median (IQR)       | 28 (13-54)                                                      | 39 (18-62)                   |                                     |                      |
| Age at pregnancy onset                        |                                                                 |                              |                                     |                      |
| ≤19                                           | 586 (4.5)                                                       | 637 (1.2)                    | 1006 (2.5)                          | 12581 (1.3)          |
| 20-24                                         | 2321 (17.8)                                                     | 5966 (11.6)                  | 5968 (14.8)                         | 106617 (10.7)        |
| 25-29                                         | 3909 (30.0)                                                     | 16636 (32.3)                 | 12451 (30.9)                        | 329839 (33.1)        |
| 30-34                                         | 3969 (30.5)                                                     | 18776 (36.5)                 | 13432 (33.3)                        | 359099 (36.1)        |
| ≥35                                           | 2234 (17.2)                                                     | 9500 (18.4)                  | 7488 (18.6)                         | 187537 (18.8)        |
| Married or living with partner                | 10129 (77.8)                                                    | 44776 (86.9)                 | 33177 (82.2)                        | 878059 (88.2)        |
| Place of birth                                |                                                                 |                              |                                     |                      |
| Denmark                                       | 11476 (88.2)                                                    | 44434 (86.3)                 | 35370 (87.7)                        | 844388 (84.8)        |
| Europe                                        | 563 (4.3)                                                       | 2518 (4.9)                   | 1813 (4.5)                          | 54605 (5.5)          |
| Outside of Europe                             | 980 (7.5)                                                       | 4563 (8.9)                   | 3162 (7.8)                          | 96680 (9.7)          |
| Region of residence                           |                                                                 |                              |                                     |                      |
| The Capital Region of Denmark                 | 4241 (32.6)                                                     | 15288 (29.7)                 | 13873 (34.4)                        | 324801 (32.6)        |
| Region Zealand                                | 2075 (15.9)                                                     | 8121 (15.8)                  | 6120 (15.2)                         | 132222 (13.3)        |
| The Region of Southern Denmark                | 2871 (22.1)                                                     | 11036 (21.4)                 | 8082 (20.0)                         | 180940 (18.2)        |
| Central Denmark Region                        | 2589 (19.9)                                                     | 11799 (22.9)                 | 8444 (20.9)                         | 256877 (25.8)        |
| The North Denmark Region                      | 1243 (9.6)                                                      | 5271 (10.2)                  | 3826 (9.5)                          | 100833 (10.1)        |
| Gross household income, quartile <sup>b</sup> |                                                                 |                              |                                     |                      |
| 1                                             | 4282 (32.9)                                                     | 11716 (22.7)                 | 9533 (23.6)                         | 248037 (24.9)        |
| 2                                             | 3184 (24.5)                                                     | 12961 (25.2)                 | 10059 (24.9)                        | 248715 (25.0)        |
| 3                                             | 2777 (21.3)                                                     | 13446 (26.1)                 | 10315 (25.6)                        | 249315 (25.0)        |
| 4                                             | 2776 (21.3)                                                     | 13392 (26.0)                 | 10438 (25.9)                        | 249606 (25.1)        |
| Education level, years                        |                                                                 |                              |                                     |                      |
| ≤11                                           | 4552 (35.0)                                                     | 14300 (27.8)                 | 12043 (29.9)                        | 206926 (20.8)        |
| 12-13                                         | 1913 (14.7)                                                     | 7621 (14.8)                  | 6051 (15.0)                         | 147521 (14.8)        |
| 14-15                                         | 3181 (24.4)                                                     | 13399 (26.0)                 | 10266 (25.5)                        | 256649 (25.8)        |
| ≥16                                           | 3373 (25.9)                                                     | 16195 (31.4)                 | 11985 (29.7)                        | 384577 (38.6)        |
| Year of pregnancy onset                       |                                                                 |                              |                                     |                      |
| 1997-2000                                     | 3799 (29.2)                                                     | 11669 (22.7)                 | 10116 (25.1)                        | 217113 (21.8)        |
| 2001-2004                                     | 3212 (24.7)                                                     | 11352 (22.0)                 | 8747 (21.7)                         | 213325 (21.4)        |
| 2005-2008                                     | 2459 (18.9)                                                     | 11607 (22.5)                 | 8898 (22.1)                         | 211547 (21.3)        |
| 2009-2012                                     | 2222 (17.1)                                                     | 10071 (19.6)                 | 7928 (19.7)                         | 195103 (19.6)        |
| 2013-2016                                     | 1327 (10.2)                                                     | 6816 (13.2)                  | 4656 (11.5)                         | 158585 (15.9)        |
| Parity                                        |                                                                 |                              |                                     |                      |
| 1                                             | 6006 (46.1)                                                     | 16079 (31.2)                 | 17707 (43.9)                        | 457903 (46.0)        |
| 2                                             | 4525 (34.8)                                                     | 23260 (45.2)                 | 14905 (36.9)                        | 360694 (36.2)        |
| ≥3                                            | 2488 (19.1)                                                     | 12176 (23.6)                 | 7733 (19.2)                         | 177076 (17.8)        |
| Multiple birth pregnancy                      | 459 (3.5)                                                       | 1870 (3.6)                   | 1606 (4.0)                          | 41671 (4.2)          |
| Smoking during pregnancy                      | 3379 (26.0)                                                     | 10813 (21.0)                 | 9001 (22.3)                         | 147225 (14.8)        |
| Previous pregnancy with major birth defect    | 196 (1.5)                                                       | 1236 (2.4)                   | 683 (1.7)                           | 17041 (1.7)          |

|                                         |             |              |              |               |
|-----------------------------------------|-------------|--------------|--------------|---------------|
| Antidiabetic drug use in past year      | 170 (1.3)   | 774 (1.5)    | 523 (1.3)    | 12256 (1.2)   |
| Drugs used for IVF in past 3 months     | 489 (3.8)   | 2436 (4.7)   | 2110 (5.2)   | 62130 (6.2)   |
| No. of drugs used in past year          |             |              |              |               |
| 1-2                                     | 4120 (31.7) | 17582 (34.1) | 7660 (19.0)  | 408280 (41.0) |
| 3-4                                     | 3350 (25.7) | 13421 (26.1) | 12590 (31.2) | 208967 (21.0) |
| ≥5                                      | 3967 (30.5) | 14169 (27.5) | 19211 (47.6) | 148838 (15.0) |
| No. of hospitalization in past year     |             |              |              |               |
| 1                                       | 1540 (11.8) | 7101 (13.8)  | 4971 (12.3)  | 123273 (12.4) |
| 2                                       | 354 (2.7)   | 1396 (2.7)   | 1098 (2.7)   | 21661 (2.2)   |
| ≥3                                      | 112 (0.9)   | 550 (1.1)    | 395 (1.0)    | 6745 (0.7)    |
| No. of outpatient contacts in past year |             |              |              |               |
| 1                                       | 1822 (14.0) | 7311 (14.2)  | 6051 (15.0)  | 136673 (13.7) |
| 2                                       | 659 (5.1)   | 2747 (5.3)   | 2299 (5.7)   | 49286 (5.0)   |
| ≥3                                      | 290 (2.2)   | 1376 (2.7)   | 1111 (2.8)   | 22820 (2.3)   |

GA: gestational age (in days since pregnancy onset). IQR: interquartile range. IVF: in vitro fertilization. <sup>a</sup>Values are numbers (percentages) unless otherwise stated. Percentages may not total 100 because of rounding. <sup>b</sup>Gross hold income quartiles presented for the macrolide-exposed pregnancies are for the main comparison of vs. penicillin-exposed pregnancies.

**Supplementary Table D. Number of tablets redeemed and days of coverage.**

| Study antibiotic        | Strength (mg), median (IQR) | No. of tablets redeemed, median (IQR) | Estimated days of coverage <sup>a</sup> |
|-------------------------|-----------------------------|---------------------------------------|-----------------------------------------|
| Azithromycin            | 500 (500-500)               | 3 (2-3)                               | 3 days                                  |
| Clarithromycin          | 500 (500-500)               | 14 (7-14)                             | 7 days                                  |
| Erythromycin            | 500 (500-500)               | 20 (20-30)                            | 5 days                                  |
| Roxithromycin           | 300 (150-300)               | 10 (7-20)                             | 10 days                                 |
| Spiramycin              | 500 (500-500)               | 24 (24-24)                            | 6 days                                  |
| Phenoxymethylpenicillin | 800 (660-800)               | 20 (20-30)                            | 7 days                                  |

<sup>a</sup>Days of coverage calculated by no. of tablets redeemed divided by the required number of tablets used for the standard recommended daily doses for the individual study antibiotics, defined as: azithromycin 500mg, clarithromycin 1000mg, erythromycin 2000mg, roxithromycin 300mg, and spiramycin 2000mg daily as well as phenoxymethylpenicillin 660-800mg three times daily. IQR: interquartile range.

**Supplementary Table E. Additional pregnancy outcomes for the matched main comparison between macrolide-exposed and penicillin-exposed pregnancies.**

| <b>Other pregnancy outcomes</b>                 | <b>Macrolide-exposed<br/>(n=13017)</b> | <b>Penicillin-exposed<br/>(n=13017)</b> | <b>p-value</b> |
|-------------------------------------------------|----------------------------------------|-----------------------------------------|----------------|
| Preterm birth (n / %)                           | 985 / 7.6                              | 941 / 7.2                               | 0.30           |
| Small for gestational age (n / %)               | 1439 / 11.1                            | 1372 / 10.5                             | 0.18           |
| Cesarean section (n / %)                        | 2764 / 21.2                            | 2712 / 20.8                             | 0.43           |
| Placental weight (kg) (mean / IQR)              | 659.4 / 550-650                        | 660.5 / 550-650                         | 0.65           |
| Length at birth (cm) (mean / IQR)               | 51.2 / 50-53                           | 51.2 / 50-53                            | 0.85           |
| Head circumference (cm) (mean / IQR)            | 34.1 / 34-35                           | 34.0 / 34-35                            | 0.75           |
| Low Apgar score after 5 minutes (<7) (n / %)[3] | 154 / 1.2                              | 171 / 1.3                               | 0.34           |
| Perinatal death (n / %)                         | 33 / 0.3                               | 48 / 0.4                                | 0.09           |



**Supplementary Table F. Standardized differences before and after propensity score matching.**

| Characteristics                  | Macrolide-exposed vs penicillin-exposed pregnancies |                | Macrolide-exposed vs unexposed pregnancies with recent prior use |                | Macrolide-exposed vs unexposed pregnancies |                |
|----------------------------------|-----------------------------------------------------|----------------|------------------------------------------------------------------|----------------|--------------------------------------------|----------------|
|                                  | Before matching                                     | After matching | Before matching                                                  | After matching | Before matching                            | After matching |
| Age at pregnancy onset           |                                                     |                |                                                                  |                |                                            |                |
| ≤19                              | 19.7                                                | 5.2            | 10.9                                                             | 0.7            | 19.4                                       | 0.8            |
| 20-24                            | 17.7                                                | 1.1            | 8.2                                                              | 0.1            | 20.5                                       | 1.1            |
| 25-29                            | 4.9                                                 | 2.4            | 1.8                                                              | 1.3            | 6.7                                        | 0.3            |
| 30-34                            | 12.7                                                | 1.2            | 6.0                                                              | 0.3            | 11.9                                       | 0.1            |
| ≥35                              | 3.4                                                 | 0.5            | 3.7                                                              | 0.7            | 4.4                                        | 1.2            |
| Married or living with partner   | 24.1                                                | 2.9            | 11.1                                                             | 1.8            | 27.9                                       | 0.2            |
| Place of birth                   |                                                     |                |                                                                  |                |                                            |                |
| Denmark                          | 5.7                                                 | 0.9            | 1.5                                                              | 3.7            | 9.8                                        | 2.3            |
| Europe                           | 2.7                                                 | 1.4            | 0.8                                                              | 2.6            | 5.4                                        | 1.8            |
| Outside of Europe                | 4.9                                                 | 0.1            | 1.2                                                              | 2.5            | 7.8                                        | 1.4            |
| Region of residence              |                                                     |                |                                                                  |                |                                            |                |
| The Capital Region of Denmark    | 6.3                                                 | 1.2            | 3.8                                                              | 2.0            | 0.1                                        | 0.1            |
| Region Zealand                   | 0.5                                                 | 0.7            | 2.1                                                              | 0.4            | 7.5                                        | 0.2            |
| The Region of Southern Denmark   | 1.5                                                 | 1.4            | 5.0                                                              | 0.2            | 9.7                                        | 0.0            |
| Central Denmark Region           | 7.4                                                 | 1.0            | 2.6                                                              | 0.8            | 14.1                                       | 0.4            |
| The North Denmark Region         | 2.3                                                 | 1.7            | 0.2                                                              | 1.3            | 2.0                                        | 1.2            |
| Gross household income, quartile |                                                     |                |                                                                  |                |                                            |                |
| 1                                | 22.8                                                | 3.0            | 12.8                                                             | 1.9            | 23.5                                       | 0.1            |
| 2                                | 1.6                                                 | 0.4            | 0.6                                                              | 2.4            | 0.7                                        | 0.2            |
| 3                                | 11.2                                                | 1.5            | 5.4                                                              | 2.1            | 10.4                                       | 0.1            |
| 4                                | 11.0                                                | 1.6            | 8.4                                                              | 2.4            | 16.1                                       | 0.2            |
| Education level, years           |                                                     |                |                                                                  |                |                                            |                |
| <12                              | 15.6                                                | 2.3            | 10.9                                                             | 2.0            | 32.0                                       | 1.2            |
| 12-13                            | 0.3                                                 | 0.3            | 0.9                                                              | 0.4            | 0.3                                        | 1.0            |
| 14-15                            | 3.6                                                 | 1.4            | 2.3                                                              | 0.4            | 3.1                                        | 0.1            |
| >15                              | 12.3                                                | 0.9            | 8.5                                                              | 2.1            | 27.5                                       | 0.7            |
| Year of pregnancy onset          |                                                     |                |                                                                  |                |                                            |                |
| 1997-2000                        | 14.9                                                | 1.4            | 9.3                                                              | 2.1            | 17.0                                       | 0.6            |
| 2001-2004                        | 6.2                                                 | 0.9            | 7.1                                                              | 1.5            | 7.7                                        | 0.4            |
| 2005-2008                        | 9.0                                                 | 0.4            | 7.9                                                              | 1.4            | 5.9                                        | 0.3            |
| 2009-2012                        | 6.4                                                 | 1.3            | 6.7                                                              | 1.3            | 6.5                                        | 0.3            |
| 2013-2016                        | 9.5                                                 | 1.3            | 4.3                                                              | 1.3            | 17.1                                       | 1.1            |
| Parity                           |                                                     |                |                                                                  |                |                                            |                |
| 1                                | 30.0                                                | 0.1            | 4.5                                                              | 2.0            | 0.3                                        | 2.6            |
| 2                                | 20.3                                                | 0.9            | 4.6                                                              | 0.2            | 3.1                                        | 1.5            |
| ≥3                               | 11.1                                                | 1.2            | 0.1                                                              | 2.8            | 3.4                                        | 1.5            |
| Multiple birth pregnancy         | 0.6                                                 | 2.1            | 2.4                                                              | 7.4            | 3.4                                        | 4.5            |
| Smoking during pregnancy         | 11.7                                                | 2.7            | 8.5                                                              | 2.0            | 28.0                                       | 1.4            |

|                                            |      |     |      |     |      |     |
|--------------------------------------------|------|-----|------|-----|------|-----|
| Previous pregnancy with major birth defect | 6.5  | 1.6 | 1.5  | 1.5 | 1.6  | 3.0 |
| Antidiabetic drugs use in past year        | 1.7  | 0.5 | 0.1  | 1.8 | 0.7  | 3.3 |
| Drugs used for IVF in past 3 months        | 4.8  | 1.3 | 7.1  | 0.4 | 11.4 | 2.0 |
| No. of drugs used in past year             |      |     |      |     |      |     |
| 1-2                                        | 8.3  | 0.3 | 26.6 | 4.1 | 19.6 | 1.6 |
| 3-4                                        | 0.9  | 0.4 | 10.6 | 0.7 | 11.2 | 1.6 |
| ≥5                                         | 11.1 | 1.3 | 31.4 | 0.1 | 37.7 | 2.4 |
| No. of hospitalization in past year        |      |     |      |     |      |     |
| 1                                          | 5.9  | 1.2 | 1.5  | 3.2 | 1.7  | 4.2 |
| 2                                          | 0.1  | 0.6 | 0.0  | 2.1 | 3.5  | 3.5 |
| ≥3                                         | 2.1  | 1.2 | 1.2  | 1.2 | 2.1  | 2.8 |
| No. of outpatient contacts in past year    |      |     |      |     |      |     |
| 1                                          | 0.6  | 0.3 | 2.9  | 3.9 | 0.8  | 3.8 |
| 2                                          | 1.2  | 0.4 | 2.8  | 2.4 | 0.5  | 5.1 |
| ≥3                                         | 2.9  | 1.3 | 3.4  | 2.7 | 0.4  | 2.9 |

**Supplementary Figure (A-C). Distribution of propensity scores before and after matching.<sup>a</sup>**

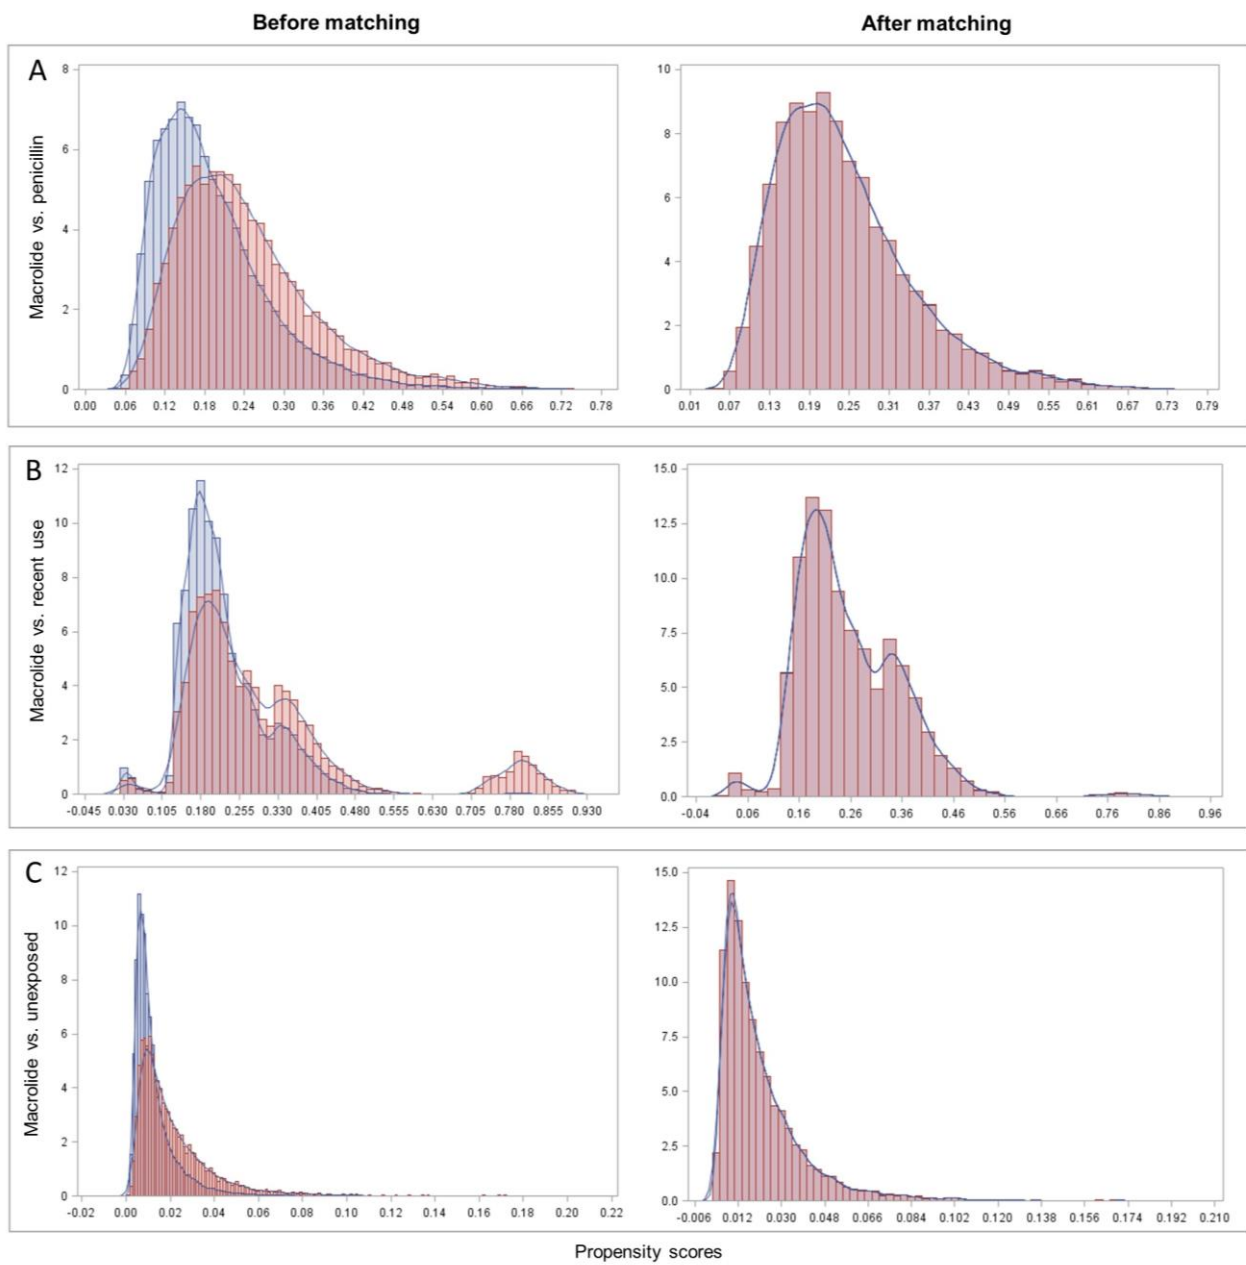

<sup>a</sup>Red color denotes macrolide-exposed pregnancies and blue color denotes the respective comparison groups.

**Supplementary Table G. Cases of major birth defects and absolute risk differences per 1000 pregnancies among macrolide-exposed compared with penicillin-exposed pregnancies.**

|                                        | Macrolide (n=13017)  | Penicillin (n=13017) | Absolute risk differences (95% CI) per 1000 pregnancies |
|----------------------------------------|----------------------|----------------------|---------------------------------------------------------|
|                                        | Per 1000 pregnancies | Per 1000 pregnancies |                                                         |
| <b>Any major birth defects</b>         | 35.1                 | 37.0                 | -1.8 (-6.4 to 2.7)                                      |
| <b>Specific birth defect subgroups</b> |                      |                      |                                                         |
| Of the nervous system                  | 1.5                  | 2.2                  | -0.7 (-1.7 to 0.3)                                      |
| Of the eye                             | 0.9                  | 1.6                  | -0.7 (-1.6 to 0.2)                                      |
| Of the face, ear, and neck             | 0.3                  | 0.3                  | 0.0 (-0.4 to 0.4)                                       |
| Of the heart                           | 9.8                  | 9.9                  | -0.2 (-2.6 to 2.2)                                      |
| Orofacial cleft                        | 2.1                  | 1.8                  | 0.2 (-0.8 to 1.3)                                       |
| Of the digestive system                | 1.8                  | 2.5                  | -0.8 (-1.9 to 0.4)                                      |
| Of the urinary system                  | 3.3                  | 2.9                  | 0.4 (-1.0 to 1.7)                                       |
| Of the external genital organs         | 2.8                  | 3.2                  | -0.4 (-1.7 to 1.0)                                      |
| Of the limbs                           | 10.6                 | 10.6                 | 0.0 (-2.5 to 2.5)                                       |
| Of the musculoskeletal system          | 1.6                  | 1.2                  | 0.5 (-0.4 to 1.4)                                       |
| Of the respiratory system              | 1.8                  | 1.4                  | 0.4 (-0.6 to 1.3)                                       |
| Other major birth defects              | 1.3                  | 1.8                  | -0.5 (-1.5 to 0.4)                                      |

**Supplementary Table H. Cases of major birth defects and absolute risk differences per 1000 pregnancies among macrolide-exposed compared with unexposed pregnancies with recent use.**

|                                        | Macrolide (n=11908)  | Recent use (n=11908) | Absolute risk differences (95% CI) per 1000 pregnancies |
|----------------------------------------|----------------------|----------------------|---------------------------------------------------------|
|                                        | Per 1000 pregnancies | Per 1000 pregnancies |                                                         |
| <b>Any major birth defects</b>         | 36.4                 | 36.4                 | -0.1 (-4.8 to 4.7)                                      |
| <b>Specific birth defect subgroups</b> |                      |                      |                                                         |
| Of the nervous system                  | 1.6                  | 0.8                  | 0.8 (-0.1 to 1.6)                                       |
| Of the eye                             | 0.9                  | 1.2                  | -0.3 (-1.1 to 0.6)                                      |
| Of the face, ear, and neck             | 0.3                  | 0.4                  | -0.1 (-0.6 to 0.4)                                      |
| Of the heart                           | 10.1                 | 9.0                  | 1.1 (-1.4 to 3.6)                                       |
| Orofacial cleft                        | 2.2                  | 1.4                  | 0.8 (-0.3 to 1.8)                                       |
| Of the digestive system                | 1.8                  | 2.0                  | -0.2 (-1.3 to 0.9)                                      |
| Of the urinary system                  | 3.0                  | 2.9                  | 0.1 (-1.3 to 1.5)                                       |
| Of the external genital organs         | 2.9                  | 2.9                  | 0.0 (-1.4 to 1.4)                                       |
| Of the limbs                           | 11.3                 | 11.2                 | 0.1 (-2.6 to 2.8)                                       |
| Of the musculoskeletal system          | 1.6                  | 1.8                  | -0.3 (-1.3 to 0.8)                                      |
| Of the respiratory system              | 1.9                  | 1.7                  | 0.3 (-0.8 to 1.3)                                       |
| Other major birth defects              | 1.4                  | 1.6                  | -0.2 (-1.2 to 0.8)                                      |

**Supplementary Table I. Cases of major birth defects and absolute risk differences per 1000 pregnancies among macrolide-exposed compared with unexposed pregnancies.**

|                                        | <b>Macrolide (n=13019)</b>  | <b>Unexposed (n=52075)</b>  | <b>Absolute risk differences (95% CI) per 1000 pregnancies</b> |
|----------------------------------------|-----------------------------|-----------------------------|----------------------------------------------------------------|
|                                        | <b>Per 1000 pregnancies</b> | <b>Per 1000 pregnancies</b> |                                                                |
| <b>Any major birth defects</b>         | 35.2                        | 33.4                        | 1.8 (-1.7 to 5.3)                                              |
| <b>Specific birth defect subgroups</b> |                             |                             |                                                                |
| Of the nervous system                  | 1.5                         | 1.3                         | 0.1 (-0.6 to 0.9)                                              |
| Of the eye                             | 0.9                         | 1.0                         | -0.1 (-0.7 to 0.5)                                             |
| Of the face, ear, and neck             | 0.3                         | 0.4                         | -0.1 (-0.4 to 0.3)                                             |
| Of the heart                           | 9.8                         | 8.5                         | 1.3 (-0.6 to 3.1)                                              |
| Orofacial cleft                        | 2.1                         | 1.8                         | 0.3 (-0.6 to 1.2)                                              |
| Of the digestive system                | 1.8                         | 2.2                         | -0.4 (-1.2 to 0.4)                                             |
| Of the urinary system                  | 3.3                         | 2.9                         | 0.4 (-0.7 to 1.5)                                              |
| Of the external genital organs         | 2.8                         | 3.3                         | -0.5 (-1.5 to 0.5)                                             |
| Of the limbs                           | 10.6                        | 10.5                        | 0.1 (-1.8 to 2.1)                                              |
| Of the musculoskeletal system          | 1.6                         | 1.2                         | 0.4 (-0.4 to 1.1)                                              |
| Of the respiratory system              | 1.8                         | 1.2                         | 0.6 (-0.2 to 1.4)                                              |
| Other major birth defects              | 1.3                         | 1.3                         | 0.0 (-0.7 to 0.7)                                              |

**Supplementary Table J. Cases of major birth defects and absolute risk differences per 1000 pregnancies among azithromycin-exposed compared with penicillin-exposed pregnancies.**

|                                        | Azithromycin<br>(n=4711) | Penicillin (n=4711)     | Absolute risk<br>differences (95% CI)<br>per 1000<br>pregnancies |
|----------------------------------------|--------------------------|-------------------------|------------------------------------------------------------------|
|                                        | Per 1000 pregnancies     | Per 1000<br>pregnancies |                                                                  |
| <b>Any major birth defects</b>         | 40.8                     | 39.1                    | 1.7 (-6.2 to 9.6)                                                |
| <b>Specific birth defect subgroups</b> |                          |                         |                                                                  |
| Of the nervous system                  | 1.1                      | 2.1                     | -1.1 (-2.7 to 0.5)                                               |
| Of the eye                             | 1.1                      | 2.3                     | -1.3 (-2.9 to 0.4)                                               |
| Of the face, ear, and neck             | NE                       |                         |                                                                  |
| Of the heart                           | 12.5                     | 9.8                     | 2.8 (-1.5 to 7.0)                                                |
| Orofacial cleft                        | 1.9                      | 1.9                     | 0.0 (-1.8 to 1.8)                                                |
| Of the digestive system                | 2.1                      | 2.8                     | -0.6 (-2.6 to 1.4)                                               |
| Of the urinary system                  | 3.6                      | 2.5                     | 1.1 (-1.2 to 3.3)                                                |
| Of the external genital organs         | 3.0                      | 3.4                     | -0.4 (-2.7 to 1.9)                                               |
| Of the limbs                           | 11.9                     | 11.9                    | 0.0 (-4.4 to 4.4)                                                |
| Of the musculoskeletal system          | 2.3                      | 1.3                     | 1.1 (-0.7 to 2.8)                                                |
| Of the respiratory system              | 3.0                      | 2.1                     | 0.8 (-1.2 to 2.9)                                                |
| Other major birth defects              | 1.3                      | 1.9                     | -0.6 (-2.2 to 1.0)                                               |

NE: not estimated.

**Supplementary Table K. Cases of major birth defects and absolute risk differences per 1000 pregnancies among erythromycin-exposed compared with penicillin-exposed pregnancies.**

|                                            | <b>Erythromycin<br/>(n=5458)</b> | <b>Penicillin (n=5458)</b>      | <b>Absolute risk<br/>differences (95%<br/>CI) per 1000<br/>pregnancies</b> |
|--------------------------------------------|----------------------------------|---------------------------------|----------------------------------------------------------------------------|
|                                            | <b>Per 1000<br/>pregnancies</b>  | <b>Per 1000<br/>pregnancies</b> |                                                                            |
| <b>Any major birth defects</b>             | 30.0                             | 36.6                            | -6.6 (-13.3 to 0.1)                                                        |
| <b>Specific birth defect<br/>subgroups</b> |                                  |                                 |                                                                            |
| Of the nervous system                      | 1.8                              | 1.6                             | 0.2 (-1.4 to 1.7)                                                          |
| Of the eye                                 | NE                               |                                 |                                                                            |
| Of the face, ear, and neck                 | NE                               |                                 |                                                                            |
| Of the heart                               | 7.3                              | 10.8                            | -3.5 (-7.0 to 0.1)                                                         |
| Orofacial cleft                            | 2.2                              | 2.2                             | 0.0 (-1.8 to 1.8)                                                          |
| Of the digestive system                    | 1.5                              | 2.9                             | -1.5 (-3.2 to 0.3)                                                         |
| Of the urinary system                      | 2.7                              | 2.7                             | 0.0 (-2.0 to 2.0)                                                          |
| Of the external genital<br>organs          | 2.4                              | 3.1                             | -0.7 (-2.7 to 1.2)                                                         |
| Of the limbs                               | 9.5                              | 9.5                             | 0.0 (-3.6 to 3.6)                                                          |
| Of the musculoskeletal<br>system           | 1.1                              | 1.1                             | 0.0 (-1.2 to 1.2)                                                          |
| Of the respiratory system                  | 1.5                              | 1.5                             | 0.0 (-1.4 to 1.4)                                                          |
| Other major birth defects                  | 0.9                              | 2.2                             | -1.3 (-2.8 to 0.2)                                                         |

NE: not estimated.



**Supplementary Table L. Cases of major birth defects and absolute risk differences per 1000 pregnancies among roxithromycin-exposed compared with penicillin-exposed pregnancies.**

|                                            | <b>Roxithromycin<br/>(n=2375)</b> | <b>Penicillin (n=2375)</b>      | <b>Absolute risk<br/>differences (95% CI)<br/>per 1000<br/>pregnancies</b> |
|--------------------------------------------|-----------------------------------|---------------------------------|----------------------------------------------------------------------------|
|                                            | <b>Per 1000<br/>pregnancies</b>   | <b>Per 1000<br/>pregnancies</b> |                                                                            |
| <b>Any major birth defects</b>             | 36.2                              | 32.8                            | 3.4 (-7.0 to 13.8)                                                         |
| <b>Specific birth defect<br/>subgroups</b> |                                   |                                 |                                                                            |
| Of the nervous system                      | 1.3                               | 3.4                             | -2.1 (-4.8 to 0.6)                                                         |
| Of the eye                                 | 2.1                               | 1.7                             | 0.4 (-2.1 to 2.9)                                                          |
| Of the face, ear, and neck                 | NE                                |                                 |                                                                            |
| Of the heart                               | 8.8                               | 8.4                             | 0.4 (-4.8 to 5.7)                                                          |
| Orofacial cleft                            | NE                                |                                 |                                                                            |
| Of the digestive system                    | 1.7                               | 1.7                             | 0.0 (-2.3 to 2.3)                                                          |
| Of the urinary system                      | 4.2                               | 3.4                             | 0.8 (-2.7 to 4.3)                                                          |
| Of the external genital<br>organs          | 4.2                               | 3.4                             | 0.8 (-2.7 to 4.3)                                                          |
| Of the limbs                               | 10.5                              | 10.1                            | 0.4 (-5.3 to 6.2)                                                          |
| Of the musculoskeletal<br>system           | NE                                |                                 |                                                                            |
| Of the respiratory system                  | NE                                |                                 |                                                                            |
| Other major birth defects                  | 1.7                               | 1.3                             | 0.4 (-1.8 to 2.6)                                                          |

**Supplementary Table M. Sensitivity analyses for the association between macrolide exposure in pregnancies and risk of any major birth defects compared with penicillin exposure in the first trimester of pregnancy.**

|                                                                          | Macrolide-exposed |               | Penicillin-exposed |               | Relative Risk Ratio (95% CI) |
|--------------------------------------------------------------------------|-------------------|---------------|--------------------|---------------|------------------------------|
|                                                                          | No. pregnancies   | No. cases (%) | No. pregnancies    | No. cases (%) |                              |
| <b>Any major birth defects</b>                                           |                   |               |                    |               |                              |
| Filled prescription in gestational week 3-8                              | 6493              | 213 (3.3)     | 6513               | 240 (3.7)     | 0.89 (0.74 to 1.07)          |
| Among singleton pregnancies only                                         | 12558             | 421 (3.4)     | 12608              | 460 (3.7)     | 0.92 (0.81 to 1.05)          |
| Among first-time pregnancies only                                        | 5940              | 221 (3.7)     | 5945               | 240 (4.0)     | 0.92 (0.77 to 1.10)          |
| Among first pregnancies exposed to study antibiotic only                 | 12463             | 425 (3.4)     | 12739              | 464 (3.6)     | 0.94 (0.82 to 1.07)          |
| Among pregnancies with no recent (<1 month) antibiotic use <sup>a</sup>  | 11447             | 402 (3.5)     | 11846              | 429 (3.6)     | 0.97 (0.85 to 1.11)          |
| Among pregnancies with no other antibiotic use in pregnancy <sup>a</sup> | 11358             | 397 (3.5)     | 11441              | 416 (3.6)     | 0.96 (0.83 to 1.10)          |
| Cohort of live birth and induced abortion pregnancies <sup>b</sup>       | 6892              | 296 (4.3)     | 6892               | 328 (4.8)     | 0.90 (0.77 to 1.05)          |
| <b>Defects of the heart</b>                                              |                   |               |                    |               |                              |
| Filled prescription in gestational week 3-8                              | 6493              | 64 (1.0)      | 6513               | 75 (1.2)      | 0.86 (0.61 to 1.19)          |
| Among pregnancies with no recent (<1 month) antibiotic use <sup>a</sup>  | 11447             | 109 (1.0)     | 11846              | 117 (1.0)     | 0.96 (0.74 to 1.25)          |
| Among pregnancies with no other antibiotic use in pregnancy <sup>a</sup> | 11358             | 105 (0.9)     | 11441              | 111 (1.0)     | 0.95 (0.73 to 1.24)          |

<sup>a</sup>Defined as no use of any antibiotics (ATC: J01 and P01AB01) in the 1 month prior to pregnancy onset. <sup>b</sup>Data only available for live births and induced abortions (ICD-10 codes: O053 and O054) between 1 January 2004 and 31 December 2016. Identified cases of induced abortions with a confirmed birth defect occurred in 28 macrolide-exposed and 33 penicillin-exposed pregnancies, which was defined as previously described.[4] Of note, the registration of defects among induced abortions have not been validated.

**Supplementary Table N. Post-hoc analysis for the association between macrolide exposure in any trimester or in 2<sup>nd</sup> and 3<sup>rd</sup> trimester only and risk of any major birth defects and defects of external genital organs.**

|                                                                     | Macrolide-exposed |               | Penicillin-exposed |               | Relative Risk Ratio (95% CI) |
|---------------------------------------------------------------------|-------------------|---------------|--------------------|---------------|------------------------------|
|                                                                     | No. pregnancies   | No. cases (%) | No. pregnancies    | No. cases (%) |                              |
| <b>Exposure in any trimester</b>                                    |                   |               |                    |               |                              |
| Any major birth defects                                             | 23996             | 827 (3.5)     | 23996              | 810 (3.4)     | 1.02 (0.93 to 1.12)          |
| Defects of the external genital organs                              | 23996             | 76 (0.3)      | 23996              | 82 (0.3)      | 0.93 (0.68 to 1.27)          |
| <b>Exposure in 2<sup>nd</sup> and 3<sup>rd</sup> trimester only</b> |                   |               |                    |               |                              |
| Any major birth defects                                             | 12327             | 419 (3.4)     | 12318              | 398 (3.2)     | 1.05 (0.92 to 1.20)          |
| Defects of the external genital organs                              | 12327             | 46 (0.4)      | 12318              | 39 (0.3)      | 1.18 (0.77 to 1.80)          |

## References

- 1 Lyng E, Sandegaard JL, Rebolj M. The Danish National Patient Register. *Scand J Public Health* 2011;**39**:30–3. doi:10.1177/1403494811401482
- 2 EUROCAT Guide 1.4. Instructions for the registration and surveillance of congenital anomalies. Available at: [http://www.eurocat-network.eu/content/Full%20Guide%201%204%20version%2028\\_DEC2018.pdf](http://www.eurocat-network.eu/content/Full%20Guide%201%204%20version%2028_DEC2018.pdf). Retrieved May 16, 2019.
- 3 Casey BM, McIntire DD, Leveno KJ. The continuing value of the Apgar score for the assessment of newborn infants. *New England Journal of Medicine* 2001;**344**:467–71.
- 4 Pasternak B, Svanström H, Hviid A. Ondansetron in Pregnancy and Risk of Adverse Fetal Outcomes. *New England Journal of Medicine* 2013;**368**:814–23. doi:10.1056/NEJMoa1211035
